# Supplementary material
Source: Springer Nature journal article supplement (https://www.springermedizin.de/resource/supplementary/12889_2007_1100_MOESM1_ESM.pdf/9502452)
Supplement: MOESM1 [file 9502452]

## Additional file 1 – Companies by number of employees and industry in 2001

| Number of companies<br>(per cent by row)<br>[per cent by column] | Industry              |                          |                       |                         |                         |                        |                        |                         |                      |                       |                       |                |
|------------------------------------------------------------------|-----------------------|--------------------------|-----------------------|-------------------------|-------------------------|------------------------|------------------------|-------------------------|----------------------|-----------------------|-----------------------|----------------|
| Number of employees                                              | AB                    | CD                       | E                     | F                       | G                       | H                      | I                      | K                       | M                    | N                     | O                     | Total          |
| 10-19                                                            | 32<br>(1.5)<br>[66.7] | 554<br>(25.8)<br>[24.0]  | 16<br>(0.7)<br>[21.3] | 375<br>(17.4)<br>[42.5] | 523<br>(24.3)<br>[38.5] | 79<br>(3.7)<br>[34.5]  | 199<br>(9.3)<br>[44.2] | 272<br>(12.7)<br>[38.2] | 3<br>(0.1)<br>[21.4] | 54<br>(2.5)<br>[61.4] | 44<br>(2.1)<br>[42.7] | 2151<br>[34.3] |
| 20-99                                                            | 15<br>(0.5)<br>[31.3] | 1287<br>(40.3)<br>[55.7] | 48<br>(1.5)<br>[64.0] | 437<br>(13.7)<br>[49.5] | 687<br>(21.5)<br>[50.6] | 125<br>(3.9)<br>[54.6] | 175<br>(5.5)<br>[38.9] | 339<br>(10.6)<br>[47.6] | 9<br>(0.3)<br>[64.3] | 25<br>(0.8)<br>[28.4] | 45<br>(1.4)<br>[43.7] | 3192<br>[50.9] |
| 100-499                                                          | 1<br>(0.1)<br>[2.1]   | 370<br>(49.8)<br>[16.0]  | 10<br>(1.4)<br>[13.3] | 59<br>(7.9)<br>[6.7]    | 117<br>(15.8)<br>[8.6]  | 21<br>(2.8)<br>[9.2]   | 61<br>(8.2)<br>[13.6]  | 88<br>(11.8)<br>[12.3]  | 1<br>(0.1)<br>[7.1]  | 5<br>(0.7)<br>[5.7]   | 10<br>(1.4)<br>[9.7]  | 743<br>[11.8]  |
| 500-                                                             | 0<br>(0)<br>[0]       | 98<br>(53.0)<br>[4.2]    | 1<br>(0.5)<br>[1.3]   | 12<br>(6.5)<br>[1.4]    | 32<br>(17.3)<br>[2.4]   | 4<br>(2.2)<br>[1.8]    | 15<br>(8.1)<br>[3.3]   | 14<br>(7.6)<br>[2.0]    | 1<br>(0.5)<br>[7.1]  | 4<br>(2.2)<br>[4.6]   | 4<br>(2.2)<br>[3.9]   | 185<br>[3.0]   |
| Total                                                            | 48<br>(0.8)           | 2309<br>(36.8)           | 75<br>(1.2)           | 883<br>(14.1)           | 1359<br>(21.7)          | 229<br>(3.7)           | 450<br>(7.2)           | 713<br>(11.4)           | 14<br>(0.2)          | 88<br>(1.4)           | 103<br>(1.6)          | 6271<br>(100)  |

AB Agriculture, hunting and forestry, fishing

CD Mining and quarrying, manufacturing

E Electricity, gas and water supply

F Construction

G Wholesale and retail trade

H Hotels and restaurants

I Transport, storage, and communication

K Real estate, renting, and business activities

L Public administration and defence; compulsory social security

M Education

N Health and social work

O Other community, social, and personal service activities
